# Supplementary material for: Dynamic Energy Use Efficiency, Carbon Input, and Agricultural Benefits of Multiple Cropping in Southern China—A Case Study from Guangdong Province
Source: MDPI journal article supplement (doi:10.3390/agriculture14040641), 2024-04-22
Supplement: s1 [file s1]

## Supplemental Figures And Tables

**Supplemental Table S1.** Energy equivalent of inputs and outputs in various agricultural production systems.

| Particulars             | Unit | Energy equivalent (MJ unit <sup>-1</sup> ) | References |
|-------------------------|------|--------------------------------------------|------------|
| <i>A. Inputs</i>        |      |                                            |            |
| 1. Machinery            | kW   | 4.93                                       | [33]       |
| 2. Chemical fertilizers |      |                                            |            |
| Nitrogen                | kg   | 66.14                                      | [35]       |
| Phosphorus              | kg   | 12.44                                      | [35]       |
| Potassium               | kg   | 11.15                                      | [33]       |
| Compound fertilizer     | kg   | 12.83                                      | [33]       |
| 3. Plastic film         | kg   | 79.00                                      | [33]       |
| 4. Diesel               | L    | 56.31                                      | [36]       |
| 5. Pesticides           | kg   | 303.80                                     | [33]       |
| <i>B. Outputs</i>       |      |                                            |            |
| 1. Rice                 | kg   | 17.00                                      | [37]       |
| 2. Tubers               | kg   | 3.60                                       | [33]       |
| 3. Soybeans             | kg   | 14.70                                      | [33]       |
| 4. Sugarcane            | kg   | 1.20                                       | [38]       |
| 5. Peanuts              | kg   | 25.00                                      | [33]       |
| 6. Tobacco              | kg   | 0.80                                       | [33]       |
| 7. Vegetables           | kg   | 0.80                                       | [33]       |
| 8. Tea                  | kg   | 0.80                                       | [33]       |
| 9. Mulberry             | kg   | 14.90                                      | [39]       |
| 10. Fruits              | kg   | 1.90                                       | [33]       |

**Supplemental Table S2.** Emission factors used to estimate greenhouse gas emissions from agricultural inputs.

| Particulars               | Unit | Emission factor (CO <sub>2</sub> e kg unit <sup>-1</sup> ) | References |
|---------------------------|------|------------------------------------------------------------|------------|
| Machinery                 | MJ   | 0.07                                                       | [40]       |
| Nitrogen                  | kg   | 1.53                                                       | [41]       |
| Phosphorus                | kg   | 1.63                                                       | [41]       |
| Potassium                 | kg   | 0.65                                                       | [41]       |
| Plastic agricultural film | kg   | 22.70                                                      | [42]       |
| Diesel                    | kg   | 4.10                                                       | [43]       |
| Pesticides                | kg   | 14.00                                                      | [44]       |

**Supplemental Table S3.** Abbreviation for indicators related to energy, carbon input, and economic return.

| Item                                                | Abbreviation | Unit                                      | References         |
|-----------------------------------------------------|--------------|-------------------------------------------|--------------------|
| Energy input per unit sowing area                   | EIPA         | GJ·ha <sup>-1</sup>                       | [45]               |
| Energy output per unit sowing area                  | EOPA         | GJ·ha <sup>-1</sup>                       | [46]               |
| Carbon input per unit sowing area                   | CIPA         | (CO <sub>2</sub> e·kg)·ha <sup>-1</sup>   | [47]               |
| Energy input per carbon input                       | EICI         | MJ·(CO <sub>2</sub> e·kg) <sup>-1</sup>   | Defined by authors |
| Energy output per carbon input                      | EOCI         | MJ·(CO <sub>2</sub> e·kg) <sup>-1</sup>   | Defined by authors |
| Energy input on carbon input per unit sowing area   | EICIA        | J·(CO <sub>2</sub> e·kg·ha) <sup>-1</sup> | Defined by authors |
| Energy output on carbon output per unit sowing area | EOCIA        | J·(CO <sub>2</sub> e·kg·ha) <sup>-1</sup> | Defined by authors |
| Nominal economic return in crop production          | NEcR         | ×10 <sup>9</sup> Yuan                     | [48]               |
| Nominal economic return on energy input             | NEcRI        | Yuan·GJ <sup>-1</sup>                     | [48]               |
| Nominal economic return on energy output            | NEcRO        | Yuan·GJ <sup>-1</sup>                     | [48]               |
| Nominal economic return per unit sowing area        | NEcRA        | Yuan·ha <sup>-1</sup>                     | [48]               |
| Nominal economic return on carbon footprint         | NEcRC        | Yuan·(CO <sub>2</sub> e·kg) <sup>-1</sup> | [48]               |

**Supplemental Table S4.** Magnitude of residuals between original values and simulated values to assess model performance.

| Year | <i>a</i> |       |       |       |       |
|------|----------|-------|-------|-------|-------|
|      | NEcR     | NEcRI | NEcRO | NEcRA | NEcRC |
| 2011 | 0.00     | 0.00  | 0.00  | 0.00  | 0.00  |
| 2012 | 0.02     | 0.00  | 0.03  | 0.02  | 0.02  |
| 2013 | 0.02     | 0.01  | 0.03  | 0.02  | 0.02  |
| 2014 | 0.00     | 0.04  | 0.01  | 0.00  | 0.03  |
| 2015 | 0.02     | 0.01  | 0.01  | 0.01  | 0.01  |
| 2016 | 0.01     | 0.00  | 0.03  | 0.04  | 0.00  |
| 2017 | 0.02     | 0.02  | 0.01  | 0.00  | 0.02  |
| 2018 | 0.03     | 0.07  | 0.00  | 0.01  | 0.07  |
| 2019 | 0.03     | 0.02  | 0.02  | 0.03  | 0.02  |
| 2020 | 0.02     | 0.02  | 0.00  | 0.01  | 0.02  |
| 2021 | 0.01     | 0.01  | 0.01  | 0.03  | 0.01  |

**Supplemental Table S5.** Changes in the specific energy in the production of different crop categories in Guangdong Province, China, from 2011 to 2021 (kg·GJ<sup>-1</sup>).

| Year | Rice | Tubers | Soybean | Sugarcane | Peanuts | Tobacco | Vegetables | Tea   | Mulberry | Fruits |
|------|------|--------|---------|-----------|---------|---------|------------|-------|----------|--------|
| 2011 | 5.58 | 6.37   | 13.97   | 0.40      | 12.61   | 15.31   | 1.45       | 21.50 | 1.06     | 3.15   |
| 2012 | 5.45 | 6.23   | 12.80   | 0.39      | 12.47   | 14.91   | 1.42       | 20.62 | 1.03     | 3.02   |
| 2013 | 5.64 | 6.22   | 12.14   | 0.39      | 12.16   | 15.05   | 1.44       | 19.27 | 1.01     | 2.87   |
| 2014 | 5.18 | 6.26   | 11.48   | 0.38      | 11.62   | 14.71   | 1.39       | 20.24 | 0.92     | 2.32   |
| 2015 | 5.25 | 6.31   | 11.56   | 0.39      | 11.73   | 15.09   | 1.40       | 19.55 | 0.91     | 2.26   |
| 2016 | 5.41 | 6.54   | 11.66   | 0.41      | 10.26   | 12.61   | 1.22       | 19.69 | 0.92     | 2.22   |
| 2017 | 5.20 | 6.32   | 11.08   | 0.39      | 9.77    | 12.31   | 1.16       | 18.96 | 0.86     | 2.04   |
| 2018 | 5.31 | 6.47   | 11.19   | 0.38      | 9.76    | 12.36   | 1.17       | 19.45 | 0.79     | 1.95   |
| 2019 | 4.83 | 6.02   | 10.43   | 0.34      | 9.07    | 11.63   | 1.08       | 18.88 | 0.73     | 1.77   |
| 2020 | 4.63 | 5.79   | 9.95    | 0.32      | 8.61    | 11.11   | 1.02       | 16.93 | 0.69     | 1.63   |
| 2021 | 4.39 | 5.46   | 10.02   | 0.30      | 8.01    | 10.84   | 0.96       | 16.98 | 0.62     | 1.53   |

**Supplemental Table S6.** Changes in the energy productivity in the production of different crop categories in Guangdong Province, China, from 2011 to 2021 (GJ·kg<sup>-1</sup>).

| Year | Rice  | Tubers | Soybean | Sugarcane | Peanuts | Tobacco | Vegetables | Tea   | Mulberry | Fruits |
|------|-------|--------|---------|-----------|---------|---------|------------|-------|----------|--------|
| 2011 | 0.179 | 0.157  | 0.072   | 2.505     | 0.079   | 0.065   | 0.690      | 0.047 | 0.942    | 0.318  |
| 2012 | 0.183 | 0.161  | 0.078   | 2.540     | 0.080   | 0.067   | 0.703      | 0.048 | 0.969    | 0.331  |
| 2013 | 0.177 | 0.161  | 0.082   | 2.580     | 0.082   | 0.066   | 0.695      | 0.052 | 0.990    | 0.349  |
| 2014 | 0.193 | 0.160  | 0.087   | 2.617     | 0.086   | 0.068   | 0.719      | 0.049 | 1.083    | 0.430  |
| 2015 | 0.190 | 0.158  | 0.086   | 2.551     | 0.085   | 0.066   | 0.715      | 0.051 | 1.097    | 0.443  |
| 2016 | 0.185 | 0.153  | 0.086   | 2.464     | 0.097   | 0.079   | 0.819      | 0.051 | 1.090    | 0.451  |
| 2017 | 0.192 | 0.158  | 0.090   | 2.595     | 0.102   | 0.081   | 0.859      | 0.053 | 1.157    | 0.491  |
| 2018 | 0.188 | 0.155  | 0.089   | 2.649     | 0.102   | 0.081   | 0.854      | 0.051 | 1.258    | 0.514  |
| 2019 | 0.207 | 0.166  | 0.096   | 2.915     | 0.110   | 0.086   | 0.923      | 0.053 | 1.361    | 0.564  |
| 2020 | 0.216 | 0.173  | 0.100   | 3.097     | 0.116   | 0.090   | 0.979      | 0.059 | 1.440    | 0.613  |
| 2021 | 0.228 | 0.183  | 0.100   | 3.283     | 0.125   | 0.092   | 1.044      | 0.059 | 1.601    | 0.655  |

**Supplemental Table S7.** Changes in greenhouse gas emissions from agricultural inputs in Guangdong Province, China, from 2011 to 2021 ((CO<sub>2</sub>e·kg)·ha<sup>-1</sup>).

| Year | Machinery<br>power | Nitrogenous<br>fertilizer | Phosphate<br>fertilizer | Potash<br>fertilizer | Plastic<br>agricultural film | Diesel | Pesticides |
|------|--------------------|---------------------------|-------------------------|----------------------|------------------------------|--------|------------|
| 2011 | 1.50               | 286.80                    | 65.34                   | 56.91                | 184.44                       | 586.24 | 294.94     |
| 2012 | 1.54               | 290.00                    | 65.61                   | 57.86                | 185.84                       | 571.51 | 294.02     |
| 2013 | 1.58               | 282.73                    | 65.60                   | 57.80                | 191.09                       | 567.22 | 283.28     |
| 2014 | 1.72               | 262.16                    | 84.09                   | 57.40                | 198.54                       | 602.23 | 244.89     |
| 2015 | 1.77               | 264.60                    | 90.14                   | 58.20                | 202.38                       | 614.70 | 246.17     |
| 2016 | 1.58               | 272.64                    | 91.17                   | 59.13                | 197.84                       | 627.42 | 257.32     |
| 2017 | 1.58               | 263.66                    | 88.30                   | 57.58                | 197.35                       | 603.48 | 250.91     |
| 2018 | 1.57               | 253.48                    | 82.41                   | 54.50                | 190.08                       | 678.34 | 245.18     |
| 2019 | 1.55               | 241.63                    | 78.92                   | 51.49                | 182.02                       | 642.12 | 224.23     |
| 2020 | 1.54               | 230.29                    | 75.26                   | 48.48                | 173.06                       | 629.63 | 208.50     |
| 2021 | 1.54               | 216.45                    | 74.83                   | 46.86                | 172.48                       | 618.87 | 191.58     |

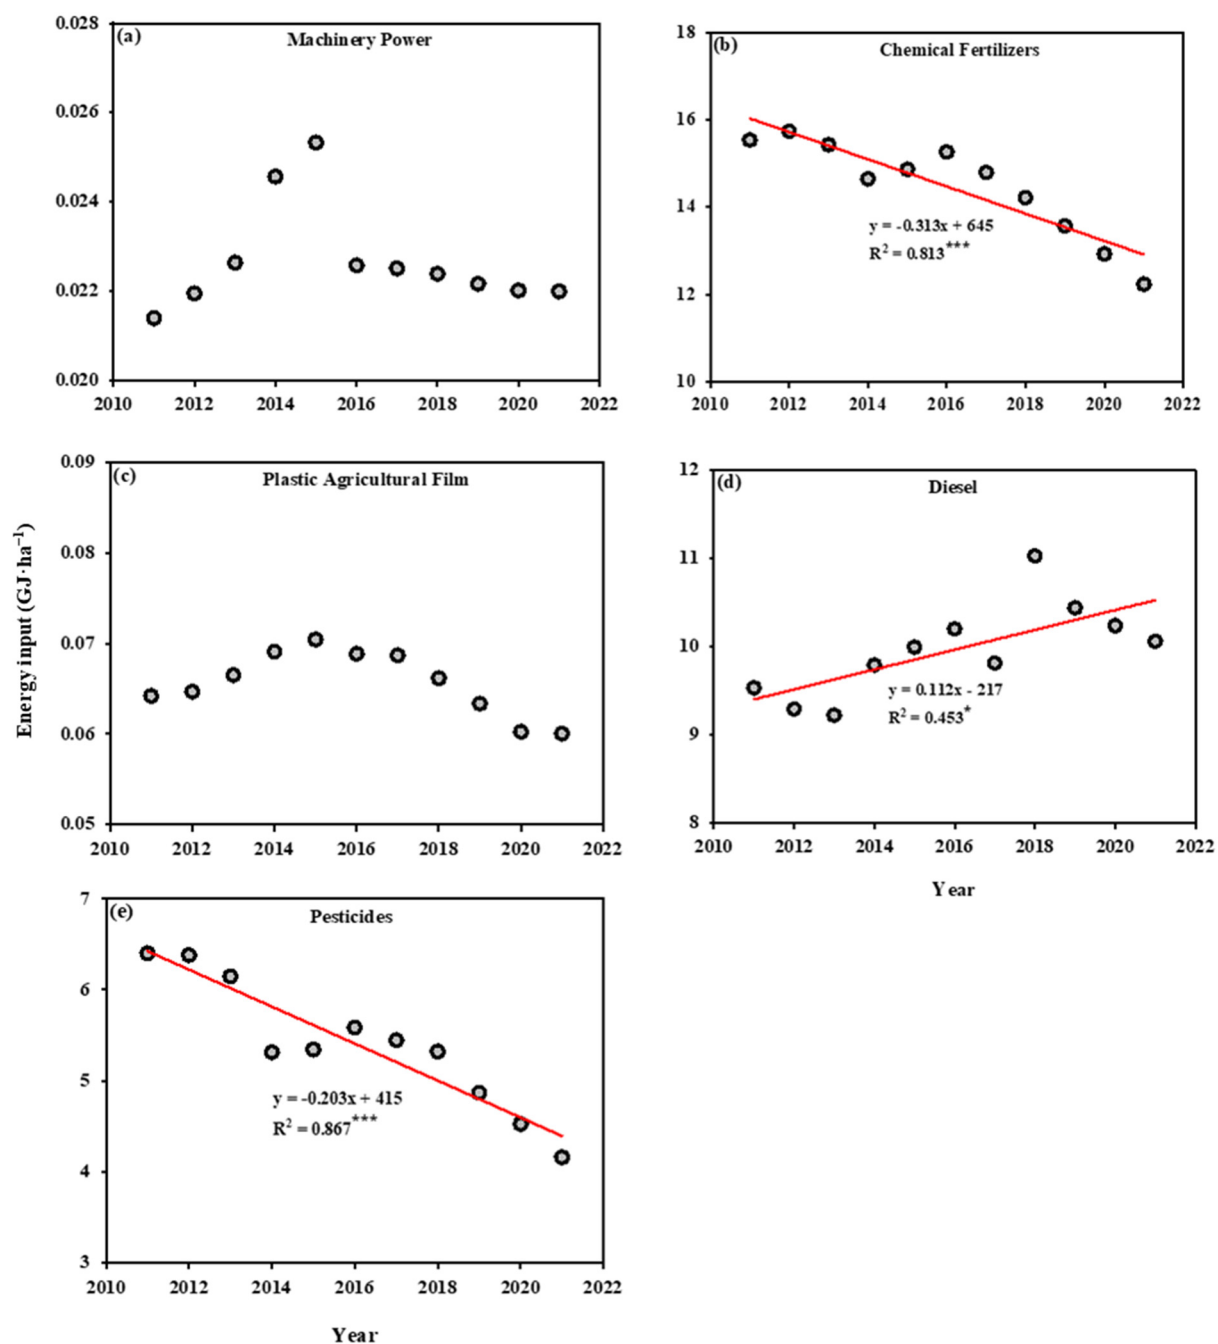

**Supplemental Figure S1.** Changes in the energy input categories, i.e., machinery (a), chemical fertilizers (b), plastic agricultural films (c), diesel (d), and pesticides (e), in crop production in Guangdong Province, China, from 2011 to 2021 ( $\text{GJ} \cdot \text{ha}^{-1}$ ).

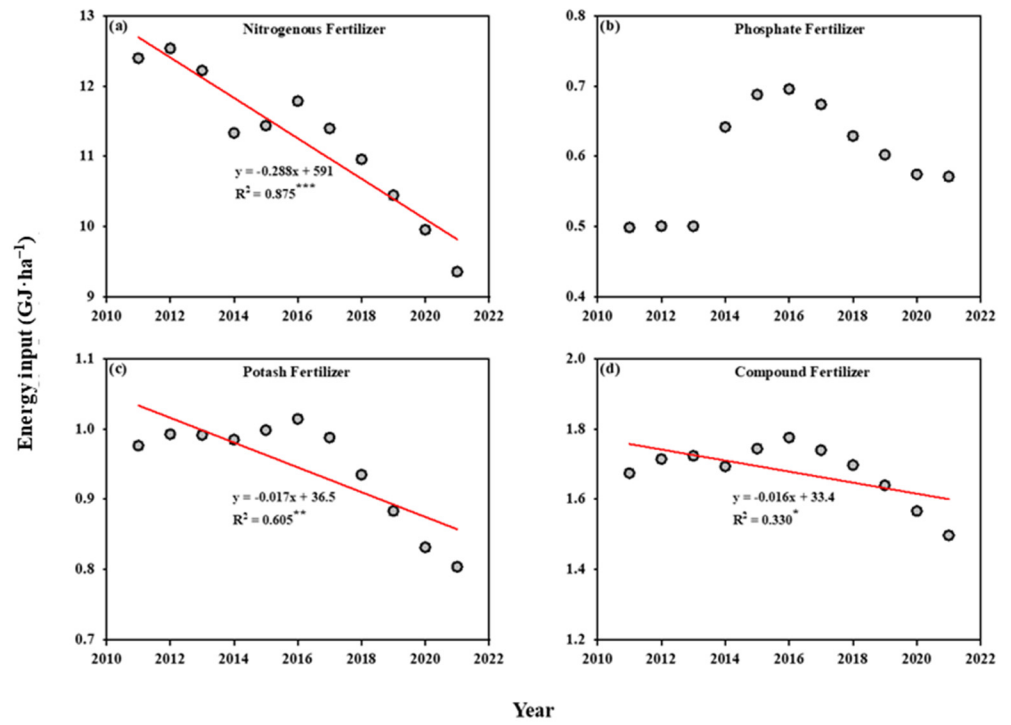

**Supplemental Figure S2.** Changes in the energy input of fertilizers, i.e., nitrogen fertilizers (a), phosphorus fertilizers (b), potassium fertilizers (c), and compound fertilizers (d), in crop production in Guangdong Province, China, from 2011 to 2021 ( $\text{GJ} \cdot \text{ha}^{-1}$ ).
